# Supplementary material
Source: publisher figshare collection journal article supplement (https://plos.figshare.com/articles/dataset/_/5521336)
Supplement: Supplementary file [file 1]

# Statistical analyses and methods evaluation form

Article id number: \_\_\_\_\_

Reviewer: \_\_\_\_\_

Evaluated: \_\_\_\_\_

Journal name: \_\_\_\_\_

Volume and pages: \_\_\_\_\_

Year: \_\_\_\_\_

DOI: \_\_\_\_\_

## Authors

Name of the first author: \_\_\_\_\_

## Design, software and primary outcome

Study design:

1. cross-sectional survey
2. longitudinal or cohort study
3. case-control
4. intervention study (clinical trial)
5. reliability / diagnostic study
6. laboratory work
7. meta-analysis
8. case study
9. other

Sample size: \_\_\_\_\_

First software: \_\_\_\_\_

Second software: \_\_\_\_\_

Statistical significance of the primary outcome:

0. Not significant
1. Significant
2. Not evaluated

|                                                           |        | No | Yes                 |
|-----------------------------------------------------------|--------|----|---------------------|
| A. Description of methods                                 |        |    |                     |
| Item A.1 Statistical methods described with enough detail |        | 0  | 1                   |
| Item A.2 Extended description of some specific procedures |        | 0  | 1                   |
| Item A.3 Software reported                                |        | 0  | 1                   |
| Item A.4 Reference to statistical literature              |        | 0  | 1                   |
| B. Ancillary analyses and computations                    |        |    |                     |
| Item B.1 Power analysis and sample calculations           |        | 0  | 1                   |
| Item B.2 Methodological considerations                    |        | 0  | 1                   |
| Item B.3 Variable transforms, recodes or constructs       |        | 0  | 1                   |
| Item B.4 Sensitivity or influence                         |        | 0  | 1                   |
| Item B.5 Stratification or sub-group analyses             |        | 0  | 1                   |
| C. Reporting of statistical inference                     |        |    |                     |
| Item C.1 P-values                                         |        | 0  | 1                   |
| Item C.2 Confidence intervals                             |        | 0  | 1                   |
| Item C.3 P-values or confidence intervals in abstract     |        | 0  | 1                   |
| Item C.4 Adjustment of p-values (multiple comparisons)    |        | 0  | 1                   |
| Item C.5 Actual p-values reported                         |        | 0  | 1                   |
| D. Number of p-values and CIs in tables and figures       |        | 0  | 1-9 10-29 $\geq 30$ |
| Item D.1 Number of p-values                               | [N1= ] | 0  | 1 2 3               |
| Item D.2 Number of CIs                                    | [N2= ] | 0  | 1 2 3               |
| E. Number of statistical tables and figure                |        | 0  | 1-2 3-4 $\geq 5$    |
| Item E.1 Number of tables                                 | [N3= ] | 0  | 1 2 3               |
| Item E.2 Number of figures                                | [N4= ] | 0  | 1 2 3               |
| F. Basic inferential methods for comparing groups         |        |    |                     |
| Item F.1 Comparison of means                              |        | 0  | 1                   |
| Item F.2 Methods for proportions and cross-tabulations    |        | 0  | 1                   |
| Item F.3 Non-parametric methods                           |        | 0  | 1                   |
| G. Basic methods for repeated measurements                |        |    |                     |
| Item G.1 Comparison of means                              |        | 0  | 1                   |
| Item G.2 Methods for proportions and cross-tabulations    |        | 0  | 1                   |
| Item G.3 Non-parametric methods                           |        | 0  | 1                   |
| H. Correlation coefficient methods                        |        |    |                     |
| Item H.1 Pearson's correlation coefficient or related     |        | 0  | 1                   |
| Item H.2 Rank correlation coefficients                    |        | 0  | 1                   |
| I. Other basic methods                                    |        |    |                     |
| Item I.1 Kaplan-Meir curve                                |        | 0  | 1                   |
| Item I.2 Epidemiological measures of disease frequency    |        | 0  | 1                   |
| Item I.3 Evaluation of normality                          |        | 0  | 1                   |
| Item I.4 Missing data methods                             |        | 0  | 1                   |
| Item I.5 Comparison of variances                          |        | 0  | 1                   |

|                                                             | No | Yes |
|-------------------------------------------------------------|----|-----|
| J. Regression methods                                       |    |     |
| Item J.1 Linear regression                                  | 0  | 1   |
| Item J.2 Logistic regression                                | 0  | 1   |
| Item J.3 Cox regression                                     | 0  | 1   |
| Item J.4 Poisson or negative binomial regression            | 0  | 1   |
| Item J.5 Other link function                                | 0  | 1   |
|                                                             |    |     |
| K. Multivariable model-building                             |    |     |
| Item K.1 Assessing assumptions                              | 0  | 1   |
| Item K.2 Methods for stepwise variable selection            | 0  | 1   |
| Item K.3 Covariate adjustments                              | 0  | 1   |
| Item K.4 Goodness of fit statistics and model validation    | 0  | 1   |
| Item K.5 Methods for analyzing interaction                  | 0  | 1   |
| Item K.6 Influence analysis and other diagnostic statistics | 0  | 1   |
|                                                             |    |     |
| L. Intra-cluster correlation methods                        |    |     |
| Item L.1 GEE                                                | 0  | 1   |
| Item L.2 Random effects models or mixed models              | 0  | 1   |
| Item L.3 Complex surveys, robust estimates or other         | 0  | 1   |
|                                                             |    |     |
| M. Measures of agreement and diagnostic tests               |    |     |
| Item M.1 Assessing agreement with continuous outcomes       | 0  | 1   |
| Item M.2 Agreement for categorical classifications          | 0  | 1   |
| Item M.3 Methods for diagnostic tests                       | 0  | 1   |
|                                                             |    |     |
| N. Meta-analysis                                            |    |     |
| Item N.1 Overall CI or p-value                              | 0  | 1   |
| Item N.2 Test of homogeneity or meta-regression             | 0  | 1   |
| Item N.3 Other meta-analysis procedure                      | 0  | 1   |
|                                                             |    |     |
| O. Other multivariable methods                              |    |     |
| Item O.1 Factor analysis                                    | 0  | 1   |
| Item O.2 Principal component analysis                       | 0  | 1   |
| Item O.3 SEM                                                | 0  | 1   |
| Item O.4 Cluster analysis                                   | 0  | 1   |
| Item O.5 Other multivariable method not classified above    | 0  | 1   |
|                                                             |    |     |
| P. Other techniques                                         |    |     |
| Item P.1 Methods for analyzing time series                  | 0  | 1   |
| Item P.2 Bayesian methods                                   | 0  | 1   |
| Item P.3 Curve fitting, spline functions or GAM             | 0  | 1   |
| Item P.4 Statistical genetics and microarray data           | 0  | 1   |
| Item P.5 Artificial neural networks or machine learning     | 0  | 1   |
| Item P.6 Simulations                                        | 0  | 1   |
| Item P.7 Bootstrap or jack-knife estimates                  | 0  | 1   |
| Item P.8 Interim analyses                                   | 0  | 1   |
| Item P.9 Cost-effectiveness analyses                        | 0  | 1   |
| Item P.10 Other technique not classified in earlier items   | 0  | 1   |
